# Supplementary material
Source: Springer Nature journal article supplement (https://www.springermedizin.de/resource/supplementary/13012_2008_165_MOESM4_ESM.pdf/9629386)
Supplement: MOESM4 [file 9629386]

## Reducing inappropriate antibiotic use in primary care: developing a knowledge translation strategy

2008 CIHR Summer Institute



June 25, 2008

Brandi Bell  
Ryan DeForge  
Elizabeth Estey  
Michelle Kho  
Leanne Mak



CIHR Institute of Health Services and Policy Research

## Acknowledgements

- Donna Ciliska
- Jill Francis
- Sharon Strauss
- Andrea Smith
- Hannah Burleton
- Other observers
- CIHR Summer Institute




CIHR Institute of Health Services and Policy Research

## Context

- **Who:** Antibiotic Resistance Task Force – Regional Health Authority
- **What:** KT strategy to reduce the inappropriate use of antibiotics for URITs in primary care settings
- **Why:** Evidence of individual and community risks associated with antibiotic resistance and use of antibiotics when they are non-essential



CIHR Institute of Health Services and Policy Research

## Outline

1. Description of multifaceted KT strategy/ intervention
2. Discussion of process and group reflections

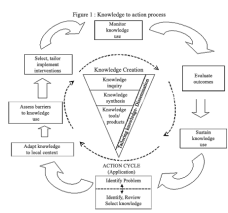


CIHR Institute of Health Services and Policy Research

## Getting started

- Logic Model approach
  - Phase 1: taskforce composition, stakeholder engagement
  - Inputs
  - Barriers/facilitators
  - Activities
  - Outputs
  - Outcomes

| Goals/objectives | To decrease the prevalence of inappropriate prescriptions         |
|------------------|-------------------------------------------------------------------|
| Inputs           | • Developing the task force, integration of stakeholders          |
| Barriers         | • Time; current (habitual) practices                              |
| Facilitators     | • Piggy-backing on existing opportunities; incentives (e.g. CMEs) |
| Activities       | • Interactive educational meetings                                |
| Outputs          | • Planned curriculum and materials                                |
| Outcomes         | • Decrease in the number of inappropriate prescriptions           |



CIHR Institute of Health Services and Policy Research

## Overview of multifaceted KT intervention

|                      | Outside the MD office | At the MD office                                                                            |
|----------------------|-----------------------|---------------------------------------------------------------------------------------------|
| Patient experience   | Well person           | Patient with URTI → Waiting room → Physician office                                         |
| Activities           | Media                 | Survey (electronic/paper) → Treatment options info → Delayed prescription                   |
| Physician experience | Interactive education | Patient with URTI → Prescription for antibiotic?                                            |
| Activities           |                       | Receive patient survey → Prescription pad → Delayed prescription → Electronic/sticker flags |



CIHR Institute of Health Services and Policy Research

## Evaluation Question

Does a multifaceted, community-based participatory KT strategy vs. no KT strategy aimed at family physicians reduce inappropriate antibiotic prescribing for upper respiratory tract infections in otherwise healthy adults and children?

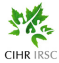

CIHR Institute of Health Services and Policy Research

## Overview of pilot cluster randomized trial design

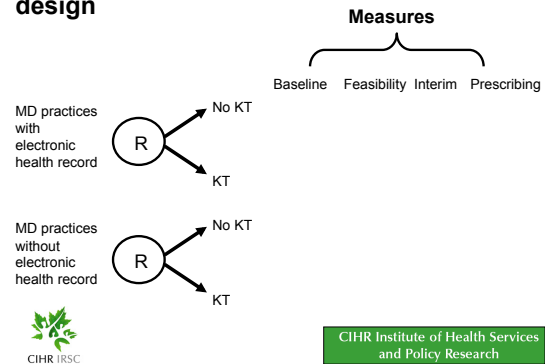

## Process – Relationship Building

- Group enablers
  - Synergy
  - Trust and respect
  - Safe space
  - Diverse voices
- Facilitator role
  - Focusing
  - Prompting
  - Expertise
  - Tone
  - Summary

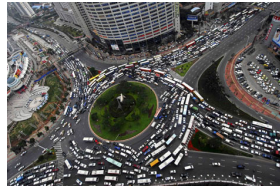

CIHR Institute of Health Services and Policy Research

## Process – Multidisciplinarity

- Clarifying language
  - “primary care setting”
  - “barriers”
- Negotiating and working with different models/approaches
  - Comfort levels varied
    - Created tension AND promoted creativity

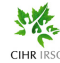

CIHR Institute of Health Services and Policy Research

## What we've learned...

- Importance of negotiation skills
- A safe space is fundamental to collaboration
- Issues are complex and require time and resources to address fully
- Individuals fit into the KT process in different ways

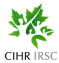

CIHR Institute of Health Services and Policy Research
